# Supplementary material for: Accelerated onset of CNS prion disease in mice co-infected with a gastrointestinal helminth pathogen during the preclinical phase
Source: PubMed Central journal article supplement (PMC7067812; doi:10.1038/s41598-020-61483-4), 2020-03-12

# **Accelerated onset of CNS prion disease in mice co-infected with a gastrointestinal helminth pathogen during the preclinical phase**

David S. Donaldson, Barry M. Bradford, Kathryn J. Else & Neil A. Mabbott

## **Supplementary Information**

**Supplementary Figure S1.** Image of the uncropped immunoblot used in Fig. 5F.

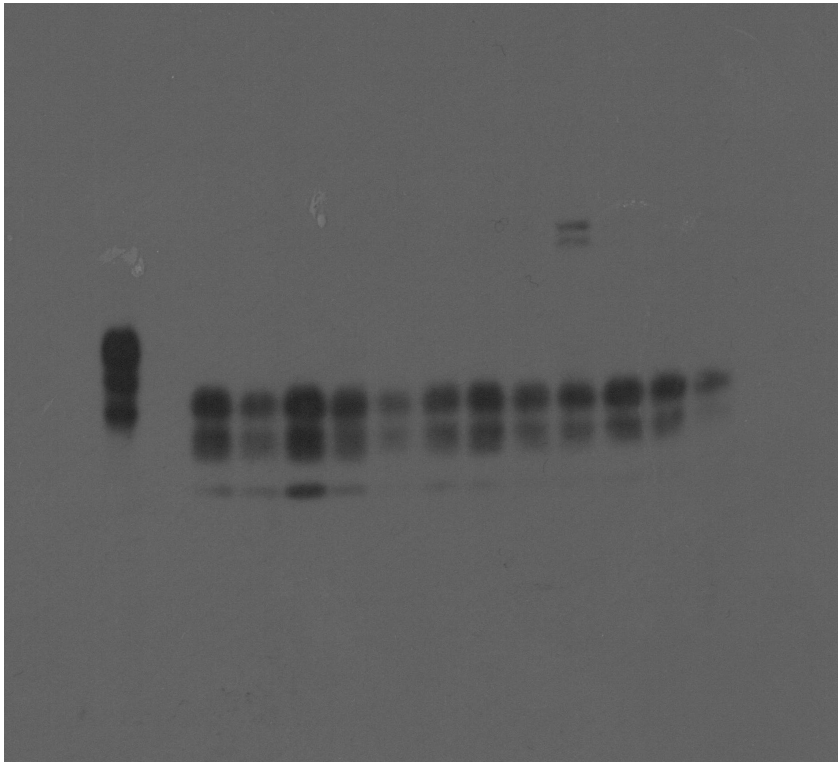

Supplement: 41598_2020_61483_MOESM1_ESM.pdf [file 41598_2020_61483_MOESM1_ESM.pdf]
